# Supplementary material for: Arterial smooth muscle cell PKD2 (TRPP1) channels regulate systemic blood pressure
Source: eLife journal article supplement (doi:10.7554/elife.42628), 2018-11-27
Supplement: supp [file elife-42628-supp-v1.zip]

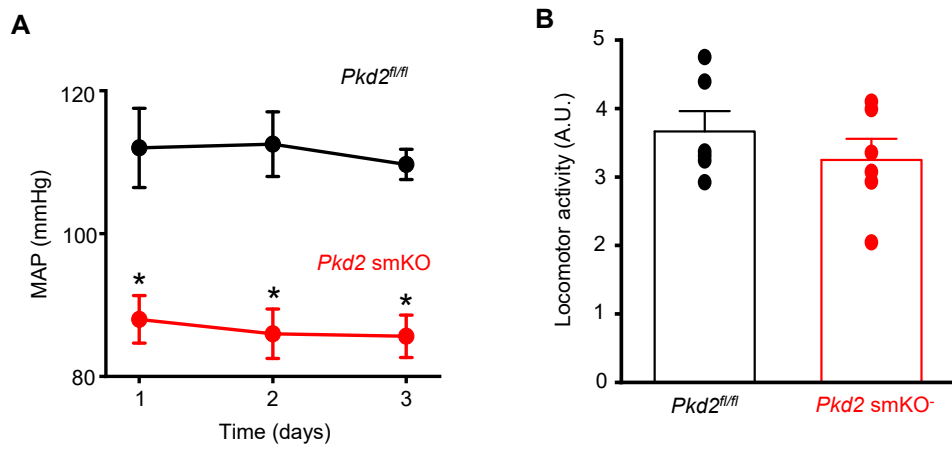

**Figure 2 - figure supplement 1: Lower blood pressure is sustained in *Pkd2* smKO mice. A:**

Mean arterial blood pressure (MAP) in *Pkd2* smKO and *Pkd2<sup>fl/fl</sup>* mice (n=6 per group). \* indicates

P<0.05 versus *Pkd2<sup>fl/fl</sup>*. **B:** Mean data of locomotor activity, n=6 per group.
