# Supplementary material for: Arterial smooth muscle cell PKD2 (TRPP1) channels regulate systemic blood pressure
Source: eLife journal article supplement (doi:10.7554/elife.42628), 2018-11-27
Supplement: supp [file elife-42628-supp-v1.zip]

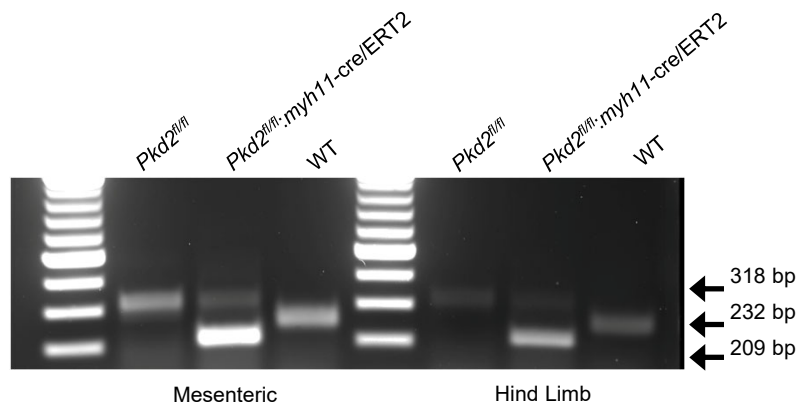

**Figure 1 – figure supplement 1 Genotyping of mouse lines.** Ethidium bromide gel illustrating PCR products in vasculature of C57BL/6J (WT) mice and tamoxifen-treated *Pkd2<sup>fl/fl</sup>* and *Pkd2<sup>fl/fl</sup>;myh11-cre/ERT2* mice.
