# Supplementary material for: Arterial smooth muscle cell PKD2 (TRPP1) channels regulate systemic blood pressure
Source: eLife journal article supplement (doi:10.7554/elife.42628), 2018-11-27
Supplement: supp [file elife-42628-supp-v1.zip]

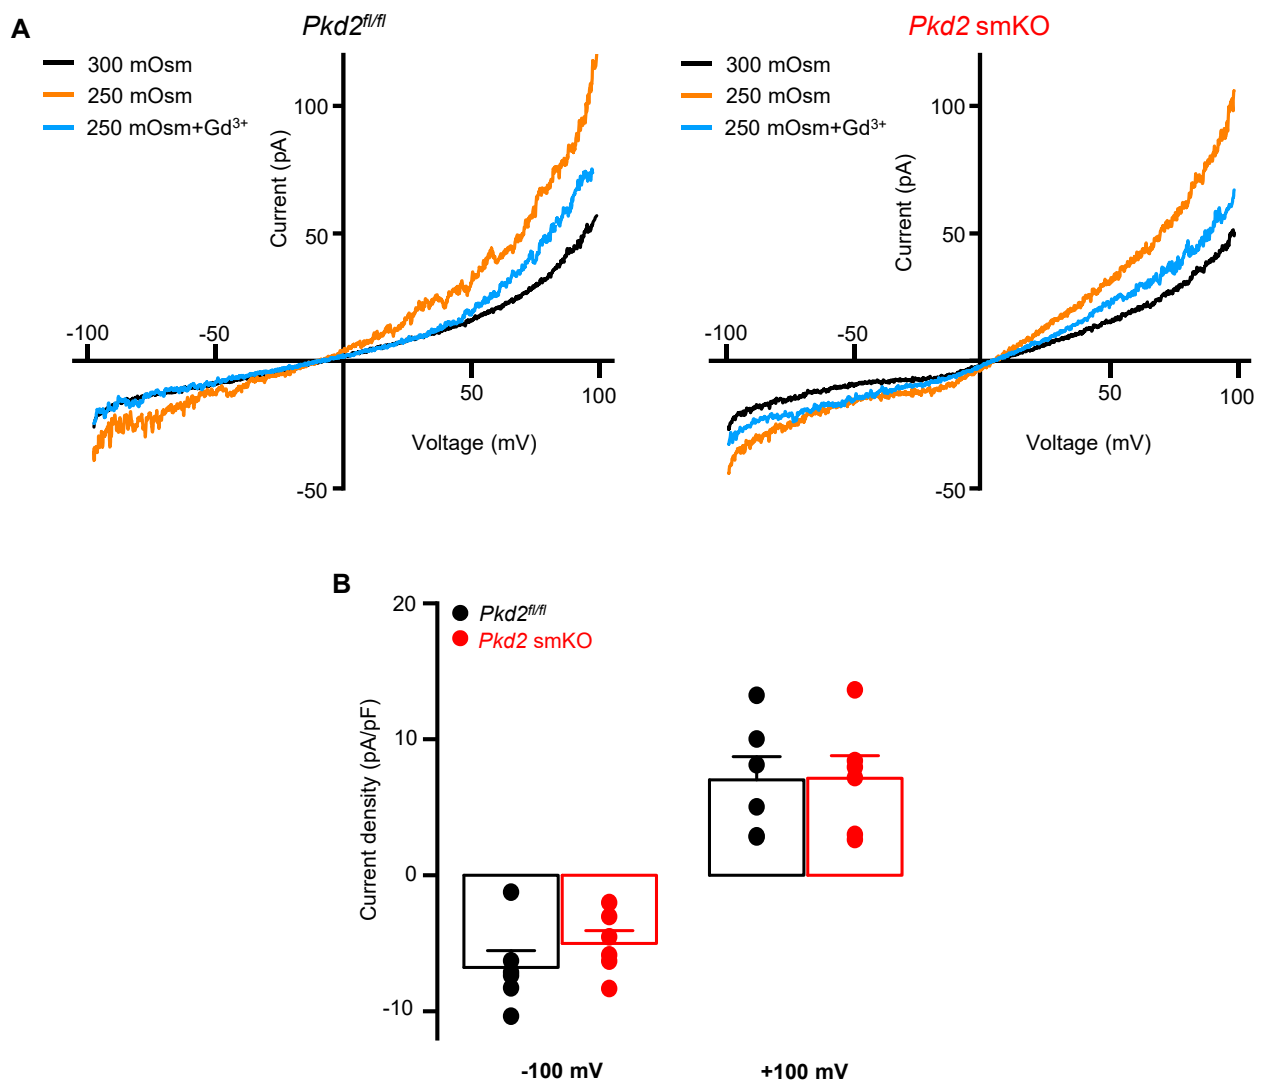

**Figure 6 - figure supplement 1: PKD2 knockout does not alter swelling-activated  $I_{cat}$  in isolated mesenteric artery myocytes.** **A:** Representative I-V relationships from the same isolated mesenteric artery myocytes of *Pkd2<sup>fl/fl</sup>* or *Pkd2 smKO* mice in isosmotic (300 mOsm), hyposmotic (250 mOsm) and hyposmotic (250 mOsm) +  $Gd^{3+}$  (100  $\mu$ M) solutions. **B:** Mean data for hyposmotic-activated  $Gd^{3+}$  (100  $\mu$ M)-sensitive cationic current density at -100 and +100 mV (*Pkd2<sup>fl/fl</sup>*, n=6 and *Pkd2 smKO*, n=6).
