# Supplementary material for: Arterial smooth muscle cell PKD2 (TRPP1) channels regulate systemic blood pressure
Source: eLife journal article supplement (doi:10.7554/elife.42628), 2018-11-27
Supplement: supp [file elife-42628-supp-v1.zip]

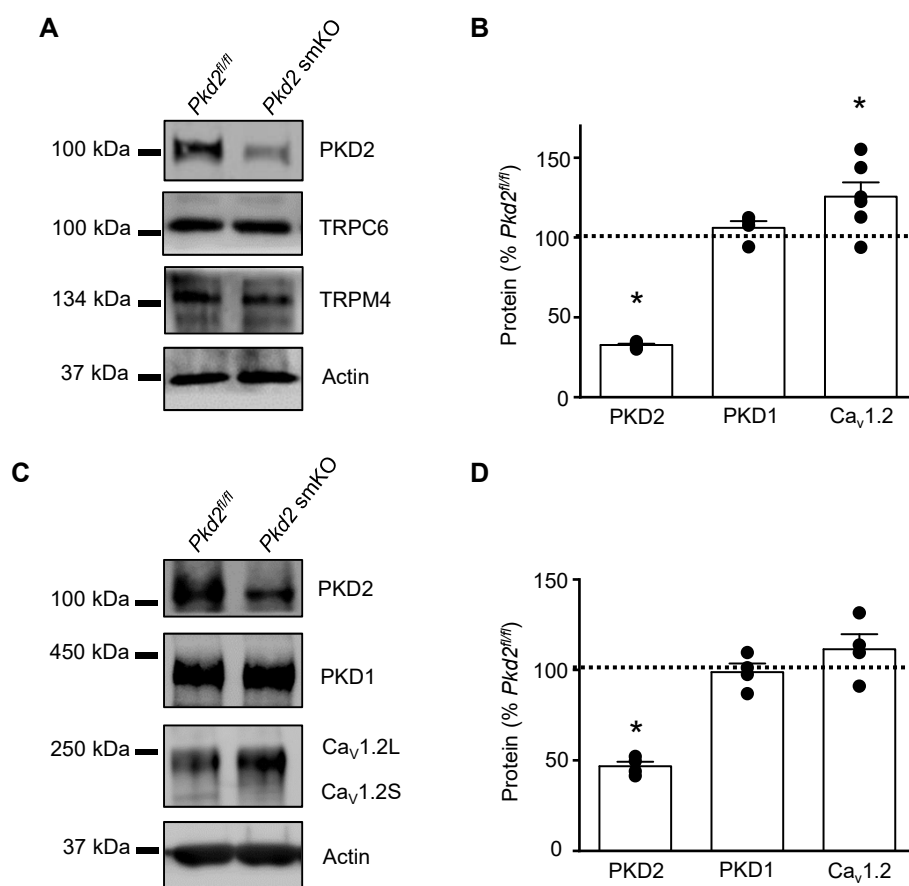

**Figure 1 – figure supplement 2: PKD2 protein is lower in aorta and mesenteric and hindlimb arteries from tamoxifen-treated *Pkd2*<sup>fl/fl</sup>:*myh11-cre/ERT2* mice.** **A:** Western blots illustrating PKD2 protein was lower in mesenteric arteries of tamoxifen-treated *Pkd2*<sup>fl/fl</sup>:*myh11-cre/ERT2* mice, whereas other proteins were similar. **B:** Mean data for proteins in hindlimb arteries of *Pkd2* smKO mice (n=4-6). **C:** Western blots of proteins in aorta. Ca<sub>v</sub>1.2L, full-length Ca<sub>v</sub>1.2; Ca<sub>v</sub>1.2S, short Ca<sub>v</sub>1.2. **D:** Mean data from aorta (n=4). \* indicates p<0.05 versus *Pkd2*<sup>fl/fl</sup>.
