# Supplementary material for: Arterial smooth muscle cell PKD2 (TRPP1) channels regulate systemic blood pressure
Source: eLife journal article supplement (doi:10.7554/elife.42628), 2018-11-27
Supplement: supp [file elife-42628-supp-v1.zip]

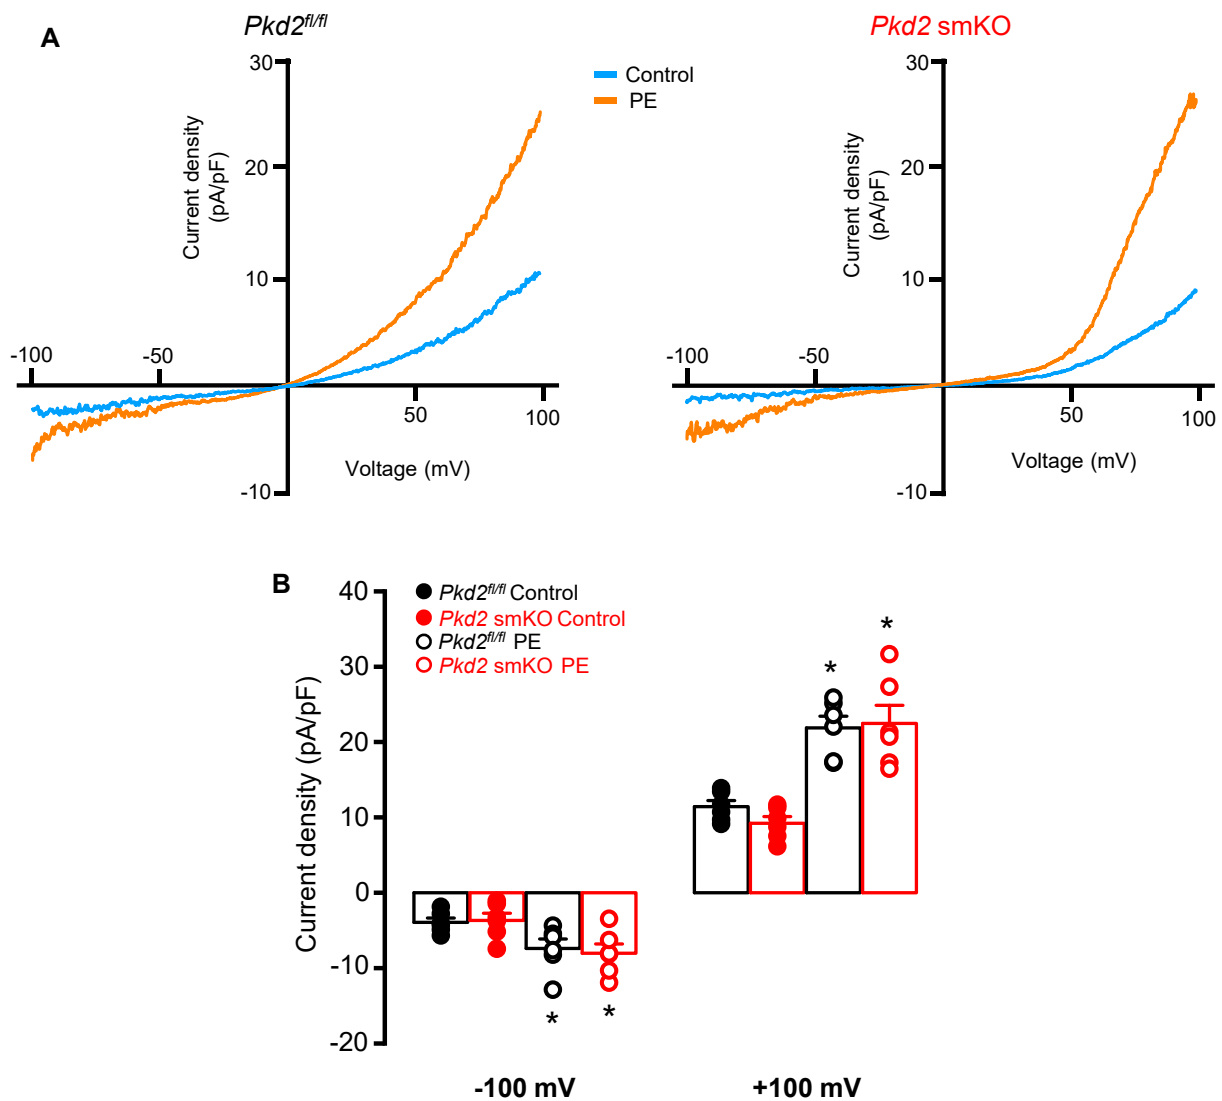

**Figure 4 - figure supplement 1: PKD2 knockout does not alter phenylephrine (PE)-activated  $I_{Cat}$  in isolated hindlimb artery myocytes** **A:** Representative I-V relationships recorded between -100 and +100 mV in the same hindlimb artery myocytes of *Pkd2<sup>fl/fl</sup>* or *Pkd2 smKO* mice in control and PE (10  $\mu$ M). **B:** Mean data for current density at -100 and +100 mV (*Pkd2<sup>fl/fl</sup>*, n=6 and *Pkd2 smKO*, n=6). \* indicates  $p < 0.05$  versus control in the same genotype.
