# Supplementary material for: Arterial smooth muscle cell PKD2 (TRPP1) channels regulate systemic blood pressure
Source: eLife journal article supplement (doi:10.7554/elife.42628), 2018-11-27
Supplement: supp [file elife-42628-supp-v1.zip]

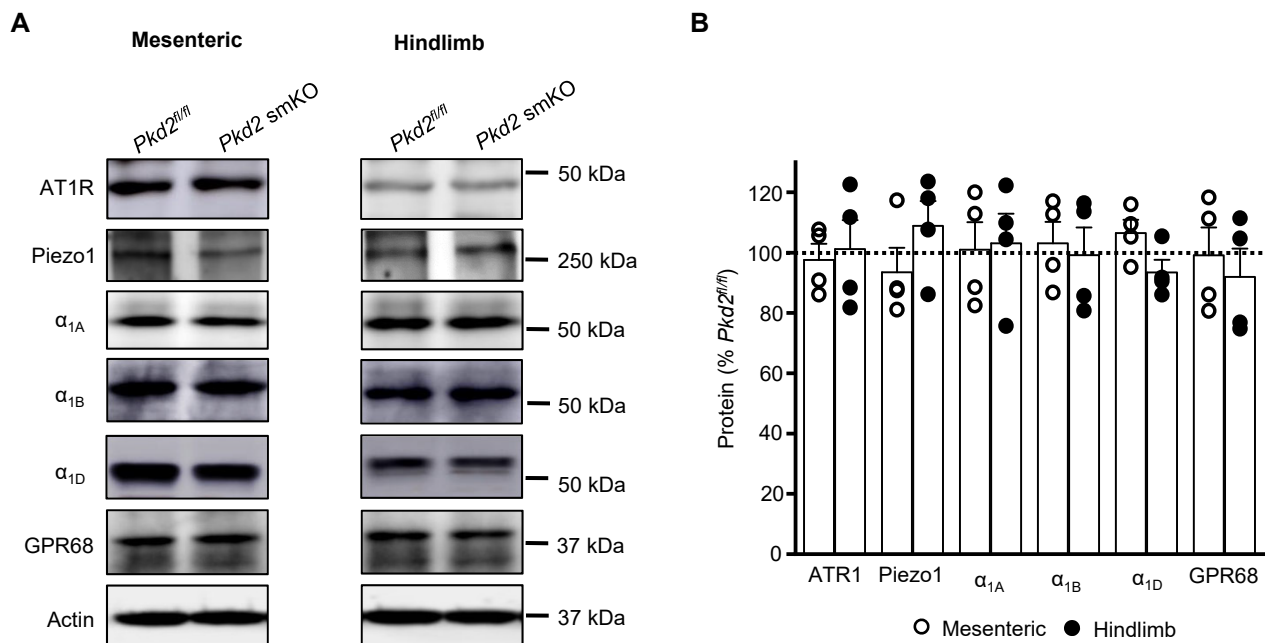

**Figure 1 – figure supplement 3: Several proteins that regulate arterial contractility are unchanged in tamoxifen-treated *Pkd2<sup>fl/fl</sup>:myh11-cre/ERT2* mice.** **A:** Western blots illustrating Angiotensin II type 1 receptor (AT1R), Piezo1,  $\alpha_1$ -adrenergic receptor A ( $\alpha_{1A}$ ),  $\alpha_1$ -adrenergic receptor B ( $\alpha_{1B}$ ),  $\alpha_1$ -adrenergic receptor D ( $\alpha_{1D}$ ) and G protein-coupled receptor 68 (GPR68) protein levels in mesenteric and hindlimb arteries of *Pkd2<sup>fl/fl</sup>* and *Pkd2<sup>fl/fl</sup>:myh11-cre/ERT2* mice. **B:** Mean data from mesenteric and hindlimb arteries (n=4 per group).
